# Supplementary material for: Efficacy and safety of stereotactic radiotherapy on elderly patients with stage I-II central non-small cell lung cancer
Source: Front Oncol. 2024 May 13;14:1235630. doi: 10.3389/fonc.2024.1235630 (PMC11128597; doi:10.3389/fonc.2024.1235630)
Supplement: Supplementary file 1 [file Table_1.docx]

| Supplementary table 1. OAR dose constraints applied for five fraction SBRT in this study. | | |
| --- | --- | --- |
| Normal tissue | Volume | Max dose |
| Total lung | Vtot - V12.5 >1500 cc* |  |
|  | Vtot - V13.5 >1000 cc |  |
|  | V5≤30% |  |
|  | V20≤12% |  |
| Trachea and large bronchus※ | V16 < 4 cc | Dmax≤38 Gy |
| Bronchus-smaller airways | V21 < 0.5 cc | Dmax≤33 Gy |
| Great vessel | V47<10 cc | Dmax≤53 Gy |
| Esophagus※ | V19.5 <5 cc | Dmax≤35 Gy |
| Heart | V32<15 cc | Dmax≤38Gy |
| Rib | V35 <1 cc | Dmax≤43Gy |
| Brachial plexus | V30<3 cc | Dmax≤30.5 Gy |
| Spinal cord | V20 < 0.35 cc | Dmax≤25 Gy |
| Chest wall | V30<30 cc | Dmax≤39.5 Gy |
| OAR: the organs at risk; Vx: volume of tissue exposed to x Gy or more; Dmax: maximum dose; *The total volume of the lung minus the volume exposed to 12.5Gy was greater than 1500cc; ※Avoid circumferential irradiation. | | |
